# Supplementary material for: Yoga for myofascial orofacial pain–A development and feasibility study
Source: Research Square preprint supplement (doi:10.21203/rs.3.rs-6640922/v1), 2025-05-15

## Appendix 2: Schedule for Active Control and Yoga group, Yoga class content and walking program

### Schedule for Active Control and Yoga group

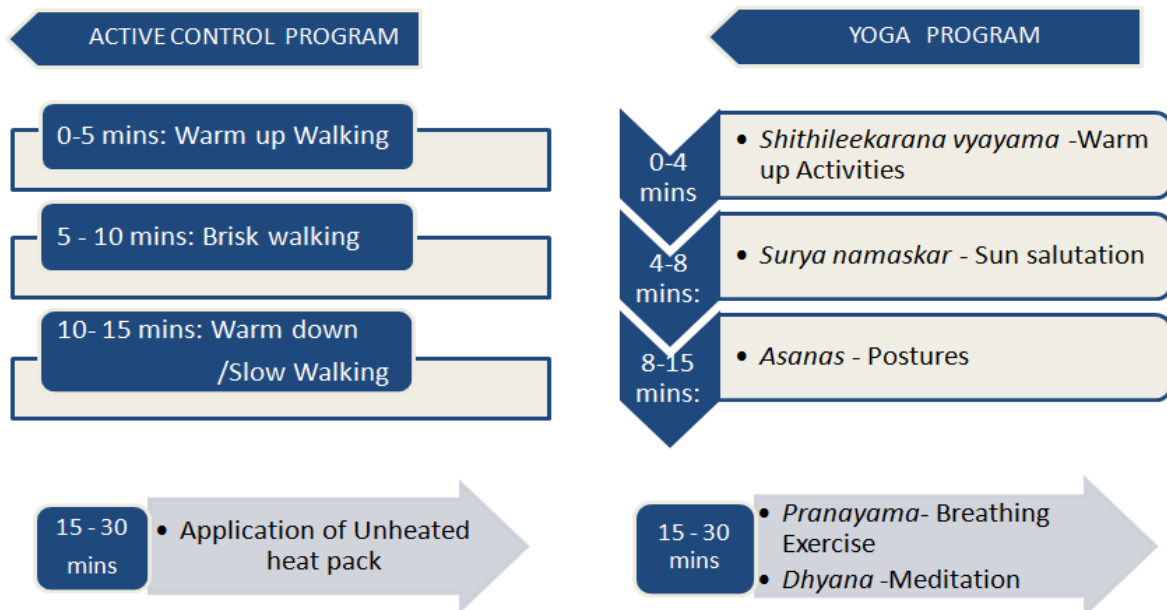

Yoga class content for week 1

**WEEK 1 - YOGA PROGRAM**

| EVENT                      | TYPE OF MOVEMENT                                                                                                                                                                                                                                                                                                                                                                                                                                                                                                                                                 | No.of Breaths/No. of repetitions *<br>duration                                                                                                                                                                | Time in mins.    |
|----------------------------|------------------------------------------------------------------------------------------------------------------------------------------------------------------------------------------------------------------------------------------------------------------------------------------------------------------------------------------------------------------------------------------------------------------------------------------------------------------------------------------------------------------------------------------------------------------|---------------------------------------------------------------------------------------------------------------------------------------------------------------------------------------------------------------|------------------|
| <b>WARM UP ACTIVITIES</b>  | Shoulder movements :<br>1. Rotation clockwise and anticlockwise<br>2. Horizontal Adduction and Abduction(flexion and extension)<br><u>Spinal twist</u><br><u>lateral twist</u><br><u>Upward dog with neck flexion and extension,</u><br><u>Right and left lateral rotation</u>                                                                                                                                                                                                                                                                                   | 10 breathing cycle (5 in clockwise and 5 in anticlockwise)<br>5 breathing cycles<br>3 breathing cycles<br>3 breathing cycles<br>4 breathing cycles (2 for neck flexion and extension; 2 for lateral rotation) | 3- 4 mins.       |
| <b>SUN SALUTATION</b>      | short sequence involving 9 postures                                                                                                                                                                                                                                                                                                                                                                                                                                                                                                                              | 4 shot sequence                                                                                                                                                                                               | 4                |
|                            | Position 1 ( <i>Pranamasana</i> -Prayer pose)<br>Position 2 ( <i>Hastha Uthanasana</i> -Raised arm pose)<br>Position 3 ( <i>Padahastanasana</i> -Hand to Foot Pose)<br>Position 4 ( <i>Aswa sanchalanasana</i> -Equestrian Pose)<br>Position 5 ( <i>Parvatasana/Adhomuka svanasana</i> -Mountain pose/ Downward stretch dog)<br>Position 6 ( <i>Aswa sanchalanasana</i> -Equestrian Pose)<br>Position 7 ( <i>Padahastanasana</i> -Hand to Foot Pose)<br>Position 8 ( <i>Hastha Uthanasana</i> -Raised arm pose)<br>Position 9 ( <i>Pranamasana</i> -Prayer pose) |                                                                                                                                                                                                               |                  |
| <b>POSTURES</b>            | <i>Utkatasana</i> - Chair posture<br><i>Vakrasana</i> - Spinal twist<br>Variation of <i>Yoga mudra</i> - Downward child posture with arm extension<br><i>Marjariasana</i> - Cat posture                                                                                                                                                                                                                                                                                                                                                                          | 2* 30 sec<br>4*30 sec<br>3*40 sec<br>4*30 sec                                                                                                                                                                 | 1<br>2<br>2<br>2 |
| Neck exercise              | 1.Clockwise and anticlockwise rotation<br>2. Right and Left lateral flexion                                                                                                                                                                                                                                                                                                                                                                                                                                                                                      |                                                                                                                                                                                                               | 1<br>1           |
| <b>RELAXATION</b>          | Shavasana - corpse pose                                                                                                                                                                                                                                                                                                                                                                                                                                                                                                                                          |                                                                                                                                                                                                               | 1                |
| <b>BREATHING EXERCISES</b> | Deep Breathing<br><i>Anuloma Viloma</i> - Alternate nostril Breathing<br><i>Mukhasana</i> - Facial breathing activity<br><i>Anuloma Viloma</i> - Alternate nostril Breathing                                                                                                                                                                                                                                                                                                                                                                                     | 5 cycles<br>3 cycles<br>3 cycles<br>2 rounds                                                                                                                                                                  | 1<br>2<br>4<br>2 |
| <b>MEDITATION</b>          | Breath Guided awareness                                                                                                                                                                                                                                                                                                                                                                                                                                                                                                                                          |                                                                                                                                                                                                               | 3                |

Yoga class content for week 2

**WEEK 2 - YOGA PROGRAM**

| EVENTS                     | TYPE OF MOVEMENT                                                                                                                                                                                                                                                                                                                                                                                                                                                                                                                                                                                                                                                                                                                       | No.of Breaths/No. Of repetitions * duration                                   | Time in mins. |
|----------------------------|----------------------------------------------------------------------------------------------------------------------------------------------------------------------------------------------------------------------------------------------------------------------------------------------------------------------------------------------------------------------------------------------------------------------------------------------------------------------------------------------------------------------------------------------------------------------------------------------------------------------------------------------------------------------------------------------------------------------------------------|-------------------------------------------------------------------------------|---------------|
| <b>RELAXATION</b>          | <i>Shavasana - corpse pose</i>                                                                                                                                                                                                                                                                                                                                                                                                                                                                                                                                                                                                                                                                                                         |                                                                               | 1             |
|                            | Deep Breathing                                                                                                                                                                                                                                                                                                                                                                                                                                                                                                                                                                                                                                                                                                                         | 5 cycles                                                                      | 1             |
| <b>WARM UP ACTIVITIES</b>  | <u>Shoulder movements :</u>                                                                                                                                                                                                                                                                                                                                                                                                                                                                                                                                                                                                                                                                                                            |                                                                               | 3- 4 mins.    |
|                            | 1. Rotation clockwise and anticlockwise                                                                                                                                                                                                                                                                                                                                                                                                                                                                                                                                                                                                                                                                                                | 10 breathing cycle (5 in clockwise and 5 in anticlockwise)                    |               |
|                            | 2. Horizontal Adduction and Abduction(flexion and extension)                                                                                                                                                                                                                                                                                                                                                                                                                                                                                                                                                                                                                                                                           | 5 breathing cycles                                                            |               |
|                            | <u>Spinal twist</u>                                                                                                                                                                                                                                                                                                                                                                                                                                                                                                                                                                                                                                                                                                                    | 3 breathing cycles                                                            |               |
|                            | <u>lateral twist</u>                                                                                                                                                                                                                                                                                                                                                                                                                                                                                                                                                                                                                                                                                                                   | 3 breathing cycles                                                            |               |
|                            | <u>Upward dog with neck flexion and extension, Right and left lateral rotation</u>                                                                                                                                                                                                                                                                                                                                                                                                                                                                                                                                                                                                                                                     | 4 breathing cycles (2 for neck flexion and extension; 2 for lateral rotation) |               |
| <b>SUN SALUTATION</b>      | <b>Short version and Full Version (given in bold face type)</b>                                                                                                                                                                                                                                                                                                                                                                                                                                                                                                                                                                                                                                                                        |                                                                               |               |
|                            | Position 1 ( <i>Pranamasana</i> -Prayer pose)<br>Position 2 ( <i>Hastha Uthanasana</i> -Raised arm pose)<br>Position 3 ( <i>Padahastanasana</i> -Hand to Foot Pose)<br>Position 4 ( <i>Aswa sanchalanasana</i> -Equestrian Pose)<br>Position 5 ( <i>Adhomuka svanasana</i> - Downward stretch dog)<br><b>Position 6 (<i>Nirkunjasana</i> -Ashtanga namaskar)</b><br><b>Position 7 (<i>Bhujangasana</i> -Serpent pose)</b><br><b>Position 8 (<i>Adhomuka svanasana</i>-Downward stretch dog)</b><br>Position 9 ( <i>Aswa sanchalanasana</i> -Equestrian Pose)<br>Position 10 ( <i>Padahastanasana</i> -Hand to Foot Pose)<br>Position 11 ( <i>Hastha Uthanasana</i> -Raised arm pose)<br>Position 12 ( <i>Pranamasana</i> -Prayer pose) | 1 short sequence<br>1 full sequence<br><br>1 short sequence                   | 4             |
| <b>POSTURES</b>            | <i>Utkatasana</i> - Chair posture                                                                                                                                                                                                                                                                                                                                                                                                                                                                                                                                                                                                                                                                                                      | 2* 30 sec                                                                     | 1             |
|                            | <i>Bharadvajasana</i> - torso twist                                                                                                                                                                                                                                                                                                                                                                                                                                                                                                                                                                                                                                                                                                    | 4*30 sec                                                                      | 2             |
|                            | <i>Variation of Yoga mudra</i> - Downward child posture with                                                                                                                                                                                                                                                                                                                                                                                                                                                                                                                                                                                                                                                                           | 3*40 sec                                                                      | 2             |
|                            | <i>Marjariasana</i> - Cat posture                                                                                                                                                                                                                                                                                                                                                                                                                                                                                                                                                                                                                                                                                                      | 4*30 sec                                                                      | 2             |
| <b>BREATHING EXERCISES</b> | <i>Bhastrika</i> - Rapid/Fast Breathing                                                                                                                                                                                                                                                                                                                                                                                                                                                                                                                                                                                                                                                                                                | 3 cycles                                                                      | 2             |
|                            | <i>Mukhasana</i> - Facial breathing                                                                                                                                                                                                                                                                                                                                                                                                                                                                                                                                                                                                                                                                                                    | 3 cycles                                                                      | 4             |
|                            | <i>Nadi Shodana</i> -Alternate nostril with retention (1:1:1)                                                                                                                                                                                                                                                                                                                                                                                                                                                                                                                                                                                                                                                                          | 2 rounds                                                                      | 2             |
| <b>MEDITATION</b>          | Breath Guided awarness + modified Kechari mudra (Rolling of tongue towards soft palate)                                                                                                                                                                                                                                                                                                                                                                                                                                                                                                                                                                                                                                                |                                                                               | 3             |

Yoga class content for week 3 and 4

| WEEK 3 & 4 - YOGA PROGRAM                                                          |                                                                                                                                                                                                                                                                                                                                                                                                                                                                                                                                                                                                                                                                                                                                         |                                                         |               |
|------------------------------------------------------------------------------------|-----------------------------------------------------------------------------------------------------------------------------------------------------------------------------------------------------------------------------------------------------------------------------------------------------------------------------------------------------------------------------------------------------------------------------------------------------------------------------------------------------------------------------------------------------------------------------------------------------------------------------------------------------------------------------------------------------------------------------------------|---------------------------------------------------------|---------------|
| EVENTS                                                                             | TYPE OF MOVEMENT                                                                                                                                                                                                                                                                                                                                                                                                                                                                                                                                                                                                                                                                                                                        | No.of Breaths/No. Of repetitions * duration             | Time in mins. |
| Centering Practices before start of Yoga                                           | <i>Shavasana - corpse pose</i>                                                                                                                                                                                                                                                                                                                                                                                                                                                                                                                                                                                                                                                                                                          |                                                         | 1             |
|                                                                                    | Deep Breathing                                                                                                                                                                                                                                                                                                                                                                                                                                                                                                                                                                                                                                                                                                                          | 5 cycles                                                | 1             |
|                                                                                    | <i>Anuloma Viloma - Alternate nostril Breathing</i>                                                                                                                                                                                                                                                                                                                                                                                                                                                                                                                                                                                                                                                                                     | 3 cycles                                                | 1             |
| <b>WARM UP ACTIVITIES</b>                                                          | <u>Shoulder movements :</u>                                                                                                                                                                                                                                                                                                                                                                                                                                                                                                                                                                                                                                                                                                             | 10 breathing cycle (5 clockwise, 5 anticlockwise)       | 3- 4 mins.    |
|                                                                                    | 1. Rotation clockwise and anticlockwise                                                                                                                                                                                                                                                                                                                                                                                                                                                                                                                                                                                                                                                                                                 |                                                         |               |
|                                                                                    | 2. Horizontal Adduction and Abduction(flexion and extension)                                                                                                                                                                                                                                                                                                                                                                                                                                                                                                                                                                                                                                                                            | 5 breathing cycles                                      |               |
|                                                                                    | <u>Spinal twist</u>                                                                                                                                                                                                                                                                                                                                                                                                                                                                                                                                                                                                                                                                                                                     | 3 breathing cycles                                      |               |
|                                                                                    | <u>lateral twist</u>                                                                                                                                                                                                                                                                                                                                                                                                                                                                                                                                                                                                                                                                                                                    | 3 breathing cycles                                      |               |
| <u>Upward dog with neck flexion and extension, Right and left lateral rotation</u> | 4 breathing cycles (2 for neck flexion and extension; 2 for lateral rotation)                                                                                                                                                                                                                                                                                                                                                                                                                                                                                                                                                                                                                                                           |                                                         |               |
| <b>SUN SALUTATION</b>                                                              | <b>Short version and Full Version (given in bold face type)</b>                                                                                                                                                                                                                                                                                                                                                                                                                                                                                                                                                                                                                                                                         |                                                         |               |
|                                                                                    | Position 1 ( <i>Pranamasana</i> -Prayer pose)<br>Position 2 ( <i>Hashta Uthanasana</i> -Raised arm pose)<br>Position 3 ( <i>Padahastanasana</i> -Hand to Foot Pose)<br>Position 4 ( <i>Aswa sanchalanasana</i> -Equestrian Pose)<br>Position 5 ( <i>Adhomuka svanasana</i> - Downward stretch dog)<br><b>Position 6 (<i>Nirkunjasana</i> -Ashtanga namaskar)</b><br><b>Position 7 (<i>Bhujangasana</i> -Serpent pose)</b><br><b>Position 9 (<i>Adhomuka svanasana</i> -Downward stretch dog)</b><br>Position 9 ( <i>Aswa sanchalanasana</i> -Equestrian Pose)<br>Position 10 ( <i>Padahastanasana</i> -Hand to Foot Pose)<br>Position 11 ( <i>Hashta Uthanasana</i> -Raised arm pose)<br>Position 12 ( <i>Pranamasana</i> -Prayer pose) | 1 short sequence<br>3 full sequence<br>1 short sequence | 4             |
| <b>POSTURES</b>                                                                    | <i>Tadasana</i> - Mountain posture                                                                                                                                                                                                                                                                                                                                                                                                                                                                                                                                                                                                                                                                                                      | 2* 30 sec                                               | 1             |
|                                                                                    | <i>Bharadvajasana</i> - torso twist                                                                                                                                                                                                                                                                                                                                                                                                                                                                                                                                                                                                                                                                                                     | 4*30 sec                                                | 2             |
|                                                                                    | <i>Matsyasana</i> - Fish posture                                                                                                                                                                                                                                                                                                                                                                                                                                                                                                                                                                                                                                                                                                        | 3*40 sec                                                | 2             |
|                                                                                    | <i>Urdhva Janu sirasana</i> - Upward facing single leg forward                                                                                                                                                                                                                                                                                                                                                                                                                                                                                                                                                                                                                                                                          | 4*30 sec                                                | 2             |
| <b>BREATHING EXERCISES</b>                                                         | <i>Nadi Shodana</i> -Alternate nostril with retention (1:2:1)                                                                                                                                                                                                                                                                                                                                                                                                                                                                                                                                                                                                                                                                           | 3 cycles                                                | 2             |
|                                                                                    | <i>Mukhasana</i> - Facial breathing                                                                                                                                                                                                                                                                                                                                                                                                                                                                                                                                                                                                                                                                                                     | 3 cycles                                                | 4             |
|                                                                                    | <i>Shanmukhi mudra</i> - Seal of sense organ                                                                                                                                                                                                                                                                                                                                                                                                                                                                                                                                                                                                                                                                                            | 2 rounds                                                | 2             |
|                                                                                    | <i>Bhramari</i> - Humming Bee breath                                                                                                                                                                                                                                                                                                                                                                                                                                                                                                                                                                                                                                                                                                    | 3 cycles                                                | 2             |
| <b>MEDITATION</b>                                                                  | 'OM' kara - OM Meditation                                                                                                                                                                                                                                                                                                                                                                                                                                                                                                                                                                                                                                                                                                               |                                                         | 3             |

Further details and particulars of yoga activities are available in ANZCTR trial registration under supporting document as Appendix 1.

<https://www.anzctr.org.au/Trial/Registration/TrialReview.aspx?id=383052&showOriginal=true&isReview=true>

*Walking program*

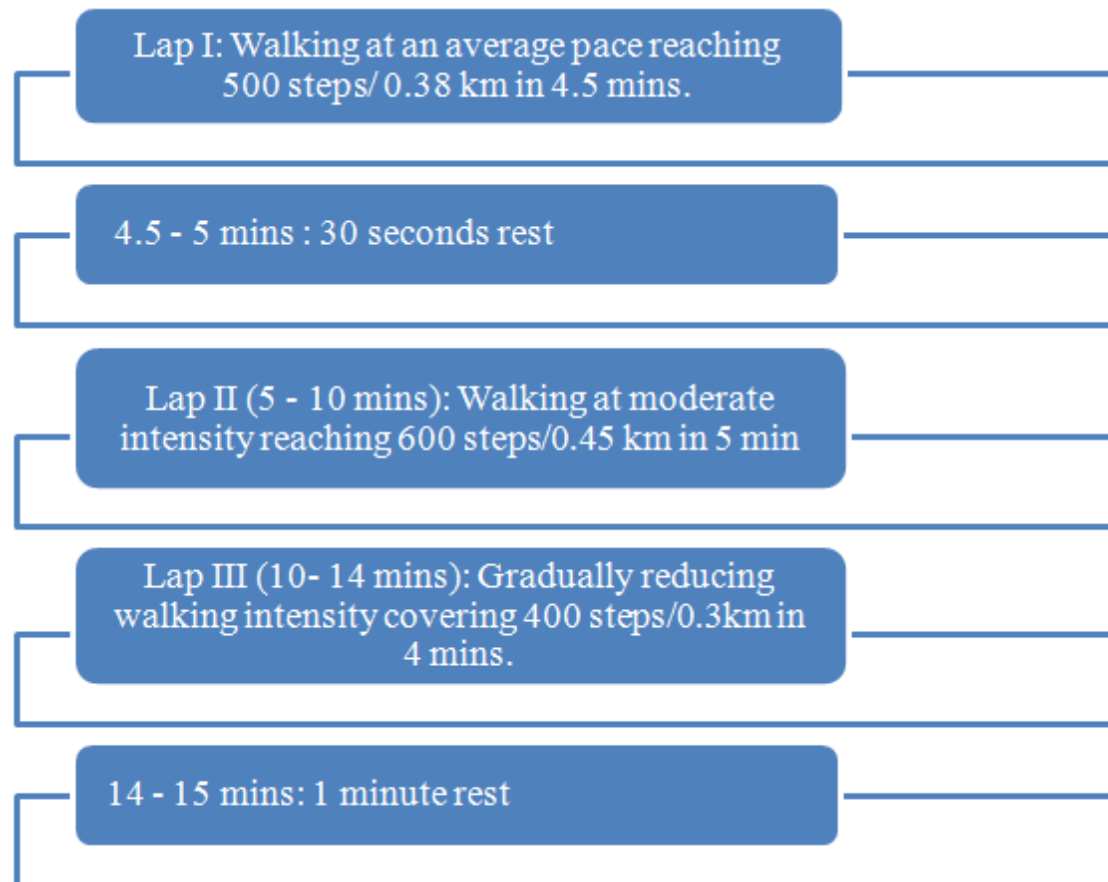

Supplement: Supplementary file 1 [file 0a213cd3f876eb9c78c530d9.pdf]
