# Supplementary material for: Yoga for myofascial orofacial pain–A development and feasibility study
Source: Research Square preprint supplement (doi:10.21203/rs.3.rs-6640922/v1), 2025-05-15
Supplement: Supplementary file 2 [file e5edd2d63a2cc25675fa2ad2.pdf]

**Supplementary Table 1: Demographics and outcome measures of the trial groups at baseline**

|                                                   | VARIABLES                                                                 | Active Control<br>(N=10) | Yoga group<br>(N=7)    | Test<br>significance                     |
|---------------------------------------------------|---------------------------------------------------------------------------|--------------------------|------------------------|------------------------------------------|
| SOCIODEMOGRAPHICS AND<br>POTENTIAL CONFOUNDERS    | Age of the participants (mean $\pm$ SD)                                   | 23.8 $\pm$ 4.5           | 23.0 $\pm$ 1.8         | 0.667 <sub>a</sub>                       |
|                                                   | Females, Males (n)                                                        | 8,2                      | 4,3                    | 0.115 (0.113 <sub>c</sub> )              |
|                                                   | Asian or Pacific Islander; Whites; Others (n)                             | 5; 3; 2                  | 2; 4; 1                | 0.529 <sub>b</sub> (0.527 <sub>c</sub> ) |
|                                                   | Course of study BDENT; BOH (n)                                            | 4; 6                     | 5; 2                   |                                          |
|                                                   | Mean duration of facial pain in months $\pm$ SD                           | 11.7 $\pm$ 22.5          | 13.4 $\pm$ 22.3        | 0.878 <sub>a</sub>                       |
|                                                   | Medication for facial pain                                                | 0                        | 0                      |                                          |
|                                                   | Medication intake for mental health                                       | 0                        | 0                      |                                          |
| PAIN                                              | Exercise and physical activity (n/total number in the group)              | 2/6                      | 1/2                    |                                          |
|                                                   | Mean characteristic pain intensity <sup>#</sup> (CPI1) score $\pm$ SD     | 22.33 $\pm$ 19.87        | 22.85 $\pm$ 22.96      | 1.0                                      |
|                                                   | Mean total pain mapping area <sup>#</sup> (Pmap1) $\pm$ SD                | 7579.5 $\pm$ 6622.1      | 10223.21 $\pm$ 8326.54 | 0.601                                    |
| JAW FUNCTION                                      | Mean total pain-related disability <sup>#</sup> $\pm$ SD                  | 0 $\pm$ 0                | 0.14 $\pm$ 0.37        | 0.669                                    |
|                                                   | Mean jaw function limitation <sup>#</sup> (JFL1) score $\pm$ SD           | 15.9 $\pm$ 21.8          | 7 $\pm$ 7.7            | 0.74                                     |
| ORAL HEALTH QUALITY<br>OF LIFE                    | Mean oral health quality of life -14 <sup>#</sup> (OHIP1) scores $\pm$ SD | 11.6 $\pm$ 7.0           | 10.57 $\pm$ 8.5        | 0.887                                    |
| PSYCHOSOCIAL FACTORS                              | Mean stress score in DASS <sup>#</sup> (DASS stress1) $\pm$ SD            | 8.4 $\pm$ 6.9            | 8.3 $\pm$ 10.2         | 0.669                                    |
|                                                   | Mean anxiety scores in DASS <sup>#</sup> (DASS anxiety1) $\pm$ SD         | 8 $\pm$ 8.9              | 8.4 $\pm$ 6.9          | 0.813                                    |
|                                                   | Mean depression scores in DASS <sup>#</sup> (DASS depression1) $\pm$ SD   | 7.8 $\pm$ 7.3            | 10.29 $\pm$ 11.04      | 0.813                                    |
|                                                   | Mean pain catastrophising <sup>#</sup> score (PCS1) $\pm$ SD              | 9.5 $\pm$ 9.8            | 16.57 $\pm$ 9.6        | 0.161                                    |
|                                                   | Mean pain self-efficacy <sup>##</sup> score (PSEQ1) $\pm$ SD              | 55 $\pm$ 7.1             | 46.1 $\pm$ 8.8         | <b>0.025*</b>                            |
| CLINICAL JAW MOBILITY<br>&<br>JAW PAIN PARAMETERS | Mean pain free opening measurements (Painfree1) $\pm$ SD                  | 44.2 $\pm$ 6             | 48.7.9 $\pm$ 11.2      | 0.364                                    |
|                                                   | Mean maximum unassisted opening measurements (Max.unassisted1) $\pm$ SD   | 51.4 $\pm$ 4.1           | 58.5 $\pm$ 8.7         | 0.109                                    |
|                                                   | Mean maximum assisted opening measurements (Max.assisted1) $\pm$ SD       | 54.1 $\pm$ 3.9           | 62.2 $\pm$ 8.7         | <b>0.07*</b>                             |
|                                                   | Mean total palpation score <sup>#</sup> (Palpation1) $\pm$ SD             | 5.2 $\pm$ 2.8            | 7.1 $\pm$ 4.4          | 0.315                                    |

Notes: p values were calculated from <sub>a</sub> independent t test to compare age and duration of facial pain symptoms; <sub>b</sub> chi square test to compare gender and ethnicity; and mann whitney test for the five core jaw muscle pain outcome measures (pain, jaw function, oral health quality of life, cognitive factors and clinical parameters of jaw mobility and pain) between yoga and active control group. Association with significance  $p < 0.05$  are indicated in bold with Asterisk. Positive responses to potential confounders are reported with question on exercise and physical activity responded by 8 participants (C-6; Y-2).

<sup>##</sup> Higher values indicate better status

<sup>#</sup> Lower values indicate better status

| CORE OUTCOMES                               | CHANGE IN OUTCOME MEASURES (day28- day1)                 | GR OUP | MEAN (SD)         | MEDIAN (IQR)                | BETWEEN-GROUP DIFFERENCE (95% CONFIDENCE INTERVAL) | TEST SIGNIFICNACE (p) |
|---------------------------------------------|----------------------------------------------------------|--------|-------------------|-----------------------------|----------------------------------------------------|-----------------------|
| PAIN                                        | Change in characteristic pain intensity score            | C      | -2.7 (14.0)       | 1.7 (-13.3 to 7.5)          | 11.6 (-11.0 to 34.3)                               | 0.536                 |
|                                             |                                                          | Y      | -14.3 (29.4)      | -3.3 (-40.0 to 10.0)        |                                                    |                       |
|                                             | Change in Total pain mapping area                        | C      | -3905.4 (7539.9)  | -1447.5 (-10368.0 to 951.8) | 6317.9 (-1942.4 to 14578.2)                        | 0.161                 |
|                                             |                                                          | Y      | -10223.2 (8326.5) | -13495.0 (-17515.0 to 0)    |                                                    |                       |
|                                             | Change in total pain-related disability                  | C      | 0.0 (0)           | 0.0                         | 0.1 (-0.1 to 0.4)                                  | 0.669                 |
|                                             |                                                          | Y      | -0.1 (0.4)        | 0.0 (0 to 0)                |                                                    |                       |
| JAW FUNCTION                                | Change in jaw function limitation score                  | C      | -4.2 (9.4)        | -1.5 (-11.0 to 1.0)         | 1.9 (-7.1 to 11.0)                                 | 0.601                 |
|                                             |                                                          | Y      | -6.1 (7.3)        | -3.0 (-15.0 to 0)           |                                                    |                       |
| ORAL HEALTH QUALITY OF LIFE                 | Change in oral health quality of life - 14 scores        | C      | -4.0 (2.9)        | -2.0 (-6.5 to -2.0)         | 4.7 (-1.6 to 11.0)                                 | 0.364                 |
|                                             |                                                          | Y      | -8.7 (8.8)        | -8.0 (-12.0 to 0)           |                                                    |                       |
| PSYCHOSOCIAL FACTORS                        | Change in stress score in DASS                           | C      | -3.4 (5.1)        | -2.0 (-6.5 to 0.5)          | -8 (-7.6 to 5.9)                                   | 1                     |
|                                             |                                                          | Y      | -2.6 (8.1)        | -2.0 (-10.0 to 4.0)         |                                                    |                       |
|                                             | Change in anxiety scores in DASS                         | C      | -4.8 (7.6)        | -2.0 (-8.0 to 0.0)          | -3.1 (-11.6 to 5.5)                                | 1                     |
|                                             |                                                          | Y      | -1.7 (8.9)        | -4.0 (-8.0 to 10.0)         |                                                    |                       |
|                                             | Change in depression scores in DASS                      | C      | -5.2 (4.9)        | -5.0 (-8.0 to 0)            | -1.2 (-8.4 to 6.0)                                 | 0.417                 |
|                                             |                                                          | Y      | -4.0 (8.9)        | 0.0 (-16.0 to 2.0)          |                                                    |                       |
|                                             | Change in Pain catastrophising score                     | C      | -3.1 (3.7)        | -2.0 (-5.8 to 0.0)          | 5.2 (-0.2 to 10.5)                                 | 0.055                 |
|                                             |                                                          | Y      | -8.3 (6.7)        | -8.0 (-9.0 to -3.0)         |                                                    |                       |
|                                             | Change in pain self efficacy score                       | C      | -3.2 (12.1)       | 0.0 (-2.8 to 3.0)           | -14.3 (-25.0 to -3.7)                              | <0.001*               |
|                                             |                                                          | Y      | 11.1 (5.8)        | 12.0 (4.0 to 16.0)          |                                                    |                       |
| CLINICAL JAW MOBILITY & JAW PAIN PARAMETERS | Change in pain free opening measurements                 | C      | 1.5 (6.0)         | 2.0 (-3.5 to 6.3)           | -8.7 (-16.6 to -0.8)                               | 0.043*                |
|                                             |                                                          | Y      | 10.2 (9.4)        | 8.0 (4.0 to 22.0)           |                                                    |                       |
|                                             | Change in maximum unassisted opening measurements        | C      | -0.4 (2.8)        | -0.5 (-2.5 to 1.5)          | -3.0 (-6.8 to 0.8)                                 | 0.161                 |
|                                             |                                                          | Y      | 2.6 (4.5)         | 1.0 (0.5 to 8.0)            |                                                    |                       |
|                                             | Change in maximum assisted opening measurements          | C      | -0.4 (2.5)        | 0.0 (-1.8 to 2.0)           | -1.3 (-4.3 to 1.6)                                 | 0.536                 |
|                                             |                                                          | Y      | 0.9 (3.3)         | 0.5 (-2.0 to 3.0)           |                                                    |                       |
|                                             | Change in total palpation score                          | C      | -1.8 (2.7)        | -3.0 (-4.0 to 1.0)          | 1.8 (-2.1 to 5.7)                                  | 0.601                 |
|                                             |                                                          | Y      | -3.6 (4.9)        | -3.0 (-6.0 to 1.0)          |                                                    |                       |
| POST STUDY FEEDBACK                         | Benefit or harm level of intervention on -10 to 10 scale | C      | 3.0 (3.4)         | 2.0 (0 to 5.0)              | -3.6 (-6.8 to -0.4)                                | 0.03* <sub>a</sub>    |
|                                             |                                                          | Y      | 6.6 (2.4)         | 7.0 (4.0 to 8.0)            |                                                    |                       |
|                                             | Number of days activity was performed                    | C      | 19.0 (6.1)        | 19.0 (14.8 to 23.8)         | -6.2 (-11.6 to -0.8)                               | 0.027* <sub>a</sub>   |
|                                             |                                                          | Y      | 25.0 (3.2)        | 26.0 (21.0 to 27.0)         |                                                    |                       |

**Supplementary Table 2: Outcome measures assessed 28-days post-intervention commencement [Primary End Point (PEP)] with N =17 (C=10; Y=7)**

Notes: p values were calculated using independent t test for post study feedback outcomes indicated by <sub>a</sub> and Mann Whitney test for all other potential outcome measures for a full RCT. Associations with significance  $p < 0.05$  are indicated in bold with Asterisk. Control group (C); Yoga group (Y). For the total palpation score, the pain scores on masseter and temporalis muscle palpation on both right and left side were added together and analysed. Primary End Point (PEP) is 28 days post-intervention commencement for post study feedback.

Supplementary table 3: Consort checklist for randomised pilot and feasibility trials

CONSORT CHECKLIST

| Section/Topic             | Item No | Extension for Pilot checklist                                                                                                                                | Reported on Page No (Pg)                   |
|---------------------------|---------|--------------------------------------------------------------------------------------------------------------------------------------------------------------|--------------------------------------------|
| <b>Title and abstract</b> |         |                                                                                                                                                              |                                            |
|                           | 1a      | Identification as a pilot or feasibility randomised trial in the title                                                                                       | Pg1,2 - Abstract                           |
|                           | 1b      | Structured summary of pilot trial design, methods, results, and conclusions (for specific guidance see CONSORT abstract extension for pilot trials)          | Pg 2,3 Abstract                            |
| <b>Introduction</b>       |         |                                                                                                                                                              |                                            |
| Background and objectives | 2a      | Scientific background and explanation of rationale for future definitive trial, and reasons for randomised pilot trial                                       | Pg 5 main document                         |
|                           | 2b      | Specific objectives or research questions for pilot trial                                                                                                    | Pg 6                                       |
| <b>Methods</b>            |         |                                                                                                                                                              |                                            |
| Trial design              | 3a      | Description of pilot trial design (such as parallel, factorial) including allocation ratio                                                                   | Pg 8 allocation ratio 1:1                  |
|                           | 3b      | Important changes to methods after pilot trial commencement (such as eligibility criteria), with reasons                                                     | reasons are mentioned in the results Pg 14 |
| Participants              | 4a      |                                                                                                                                                              |                                            |
|                           | 4b      |                                                                                                                                                              |                                            |
|                           | 4c      | How participants were identified and consented                                                                                                               | Pg 7,8                                     |
| Interventions             | 5       |                                                                                                                                                              | Pg 10,11                                   |
| Outcomes                  | 6a      | Completely defined prespecified assessments or measurements to address each pilot trial objective specified in 2b, including how and when they were assessed | Pg 17 Table 1                              |
|                           | 6b      | Any changes to pilot trial assessments or measurements after the pilot trial commenced, with reasons                                                         | no                                         |
|                           | 6c      | If applicable, prespecified criteria used to judge whether, or how, to proceed with future definitive trial                                                  |                                            |

|                                                      |     |                                                                                                                                                                                       |                                                                                                                       |
|------------------------------------------------------|-----|---------------------------------------------------------------------------------------------------------------------------------------------------------------------------------------|-----------------------------------------------------------------------------------------------------------------------|
| Sample size                                          | 7a  | Rationale for numbers in the pilot trial                                                                                                                                              | Pg 12                                                                                                                 |
|                                                      | 7b  |                                                                                                                                                                                       |                                                                                                                       |
| Randomisation:                                       |     |                                                                                                                                                                                       |                                                                                                                       |
| Sequence generation                                  | 8a  |                                                                                                                                                                                       |                                                                                                                       |
|                                                      | 8b  | Type of randomisation(s); details of any restriction (such as blocking and block size)                                                                                                | Pg 8                                                                                                                  |
| Allocation concealment mechanism                     | 9   |                                                                                                                                                                                       |                                                                                                                       |
| Implementation                                       | 10  |                                                                                                                                                                                       |                                                                                                                       |
| Blinding                                             | 11a |                                                                                                                                                                                       |                                                                                                                       |
|                                                      | 11b |                                                                                                                                                                                       |                                                                                                                       |
| Statistical methods                                  | 12a | Methods used to address each pilot trial objective whether qualitative or quantitative                                                                                                | Pg 10,11,12                                                                                                           |
|                                                      | 12b | Not applicable                                                                                                                                                                        |                                                                                                                       |
| <b>Results</b>                                       |     |                                                                                                                                                                                       |                                                                                                                       |
| Participant flow (a diagram is strongly recommended) | 13a | For each group, the numbers of participants who were approached and/or assessed for eligibility, randomly assigned, received intended treatment, and were assessed for each objective | Mentioned in the figure 2                                                                                             |
|                                                      | 13b |                                                                                                                                                                                       |                                                                                                                       |
|                                                      | 14a |                                                                                                                                                                                       |                                                                                                                       |
| Recruitment                                          | 14b | Why the pilot trial ended or was stopped                                                                                                                                              | Not applicable                                                                                                        |
| Baseline data                                        | 15  |                                                                                                                                                                                       |                                                                                                                       |
| Numbers analysed                                     | 16  | For each objective, number of participants (denominator) included in each analysis. If relevant, these numbers should be by randomised group                                          | change in number after first intervention session is mentioned, Table 3                                               |
|                                                      |     | For each objective, results including expressions of uncertainty (such as 95% confidence interval) for any estimates. If relevant, these results should be by randomised group        |                                                                                                                       |
| Outcomes and estimation                              | 17a |                                                                                                                                                                                       | Pg 14-17, Table 3                                                                                                     |
|                                                      | 17b | Not applicable                                                                                                                                                                        |                                                                                                                       |
| Ancillary analyses                                   | 18  | Results of any other analyses performed that could be used to inform the future definitive trial                                                                                      | yes, as supplementary table (analysis excluding one participant who was under care for mental health and facial pain) |
| Harms                                                | 19  |                                                                                                                                                                                       |                                                                                                                       |

|                          |     |                                                                                                                                                     |              |
|--------------------------|-----|-----------------------------------------------------------------------------------------------------------------------------------------------------|--------------|
| <b>Discussion</b>        | 19a | If relevant, other important unintended consequences                                                                                                | not relevant |
|                          |     |                                                                                                                                                     |              |
|                          |     |                                                                                                                                                     |              |
| Limitations              | 20  | Pilot trial limitations, addressing sources of potential bias and remaining uncertainty about feasibility                                           | Pg 17,18,19  |
| Generalisability         | 21  | Generalisability (applicability) of pilot trial methods and findings to future definitive trial and other studies                                   | Pg 22,23     |
| Interpretation           | 22  | Interpretation consistent with pilot trial objectives and findings, balancing potential benefits and harms, and considering other relevant evidence | Pg 19-22     |
| <b>Other information</b> |     |                                                                                                                                                     |              |
| Registration             | 23  | Registration number for pilot trial and name of trial registry                                                                                      | Pg 7         |
| Protocol                 | 24  | Where the pilot trial protocol can be accessed, if available                                                                                        | Pg 7         |
| Funding                  | 25  | Ethical approval or approval by research review committee, confirmed with reference number                                                          | Pg 7         |
